# Supplementary material for: Physicochemical Quality of Water and Health Risks Associated with the Consumption of the Extant African Lung Fish (<i>Protopterus annectens</i>) from Nyabarongo and Nyabugogo Rivers, Rwanda
Source: Preprints.org preprint supplement (doi:10.20944/preprints201912.0136.v1), 2019-12-10
Supplement: Supplementary file 1 [file supplementary]

## Sheet: NYABARONGO-RULIBA STATION
	PHYSIOCHEMICAL PROPERTIES OF WATER FROM NYABARONGO RIVER (RULIBA STATION)
	Parameter	Run 1	Run 2	Run 3
	Temperature ( )	22.3	22.9	22.6
	pH	8.15	8.22	8.08
	Salinity	0.04	0.05	0.03
	Conductivity (µs/cm)	70	75.7	77.3
	TDS (mg/L)	37	39	41
	TN (mg/L)	1.64	1.62	1.6
	NO2-N (mg/L)	0.01	0.01	0.01
	NO3-N (mg/L)	0.4	0.5	0.3
	NH4+ (mg/L)	0.15	0.17	0.14
	SO42- (mg/L)	0.56	0.59	0.59
	PO43- (mg/L)	0.41	0.43	0.42
	Fe (mg/L)	1.64	1.59	1.59
	Mn (mg/L)	0.533	0.531	0.535
	Cu (mg/L)	0.24	0.22	0.26
	Zn (mg/L)	BDL	BDL	BDL
	Cr (mg/L)	BDL	BDL	BDL
	Cd (mg/L)	0.109	0.106	0.103
	Pb (mg/L)	0.058	0.05	0.044

## Sheet: NYABARONGO-KIRINDA BRIDGE
	PHYSIOCHEMICAL PROPERTIES OF WATER FROM NYABARONGO RIVER (KIRINDA BRIDGE)
	Parameter	Run 1	Run 2	Run 3
	Temperature ( )	23.3	22.8	22.9
	pH	7.97	7.89	8.01
	Salinity	0.01	0.01	0.01
	Conductivity (µs/cm)	20.1	19.9	20
	TDS (mg/L)	10	11.5	8.5
	TN (mg/L)	1.56	1.55	1.57
	NO2-N (mg/L)	0.018	0.017	0.017
	NO3-N (mg/L)	1.39	1.41	1.37
	NH4+ (mg/L)	0.12	0.11	0.12
	SO42- (mg/L)	0.27	0.29	0.25
	PO43- (mg/L)	0.21	0.23	0.2
	Fe (mg/L)	0.65	0.62	0.62
	Mn (mg/L)	0.024	0.021	0.024
	Cu (mg/L)	BDL	BDL	BDL
	Zn (mg/L)	0.1	0.09	0.08
	Cr (mg/L)	0.06	0.056	0.058
	Cd (mg/L)	BDL	BDL	BDL
	Pb (mg/L)	0.77	0.73	0.75

## Sheet: NYABUGUGO WATER SAMPLE
	PHYSIOCHEMICAL PROPERTIES OF WATER FROM NYABUGUGO RIVER
	Parameter	Run 1	Run 2	Run 3
	Temperature ( )	22.5	22.9	22.1
	pH	8.22	8.24	8.19
	Salinity	0.05	0.05	0.04
	Conductivity (µs/cm)	102	101	103
	TDS (mg/L)	53	52.5	53.2
	TN (mg/L)	1.83	18.5	18.1
	NO2-N (mg/L)	0.014	0.012	0.017
	NO3-N (mg/L)	0.4	1.41	1.39
	NH4+ (mg/L)	0.12	0.11	0.12
	SO42- (mg/L)	0.86	0.89	0.84
	PO43- (mg/L)	0.38	0.39	0.39
	Fe (mg/L)	1.57	1.55	1.59
	Mn (mg/L)	0.47	0.52	0.48
	Cu (mg/L)	0.29	0.3	0.3
	Zn (mg/L)	0.43	0.44	0.43
	Cr (mg/L)	0.148	0.148	0.148
	Cd	BDL	BDL	BDL
	Pb (mg/L)	0.59	0.6	0.59

## Sheet: NYABARONGO FISH HEAVY METALS
	HEAVY METAL CONTENT OF P. annectens FROM NYABARONGO RIVER
	Metal	Nyabarongo river (concentration in mg/kg)
		Ruliba station			Kirinda bridge
		1	2	3	1	2	3
	Fe	273.2	272.5	272.7	336.5	336.3	335.2
	Mn	219.2	219.4	218.9	304	301.8	302
	Cu	9.2	8.7	8.5	6.7	6.3	6.2
	Zn	135.4	135.1	135.2	44.9	44.7	44.5
	Cr	148.2	147.9	147.8	138.4	138.1	138.1
	Cd	BDL	BDL	BDL	BDL	BDL	BDL
	Pb	432.5	431.5	432	304	301	302.3
